# Supplementary material
Source: ML conference proceedings conference paper supplement (https://www.ecva.net/papers/eccv_2020/papers_ECCV/html/123660630_ECCV_2020_paper.php)
Supplement: Supplementary file 1 [file 123660630-supp.pdf]

# Hierarchical Context Embedding for Region-based Object Detection (Supplementary Materials)

Zhao-Min Chen<sup>1,2</sup>, Xin Jin<sup>2</sup>, Borui Zhao<sup>2</sup>, Xiu-Shen Wei<sup>2,\*</sup>, and Yanwen Guo<sup>1,\*</sup>

<sup>1</sup> State Key Laboratory for Novel Software Technology, Nanjing University, China

<sup>2</sup> Megvii Research Nanjing, Megvii Technology, China

{chenzhaomin123, weixs.gm}@gmail.com, {jinxin, zhaoborui}@megvii.com,  
ywgao@nju.edu.cn

## 1 Visualization

In Fig. 1, we give some example images, produced by the baseline FPN (*left with red border*) and our HCE FPN (*right with green border*), respectively. The first row shows that our HCE framework can effectively filter out false positive background detection, *e.g.*, the “clock” in the first example image, while the second row shows that our method can assist in correctly classifying context-dependent objects, *e.g.*, the “kite” and “umbrella” in the third example image. This visualization and comparisons further demonstrates the motivation of our HCE framework.

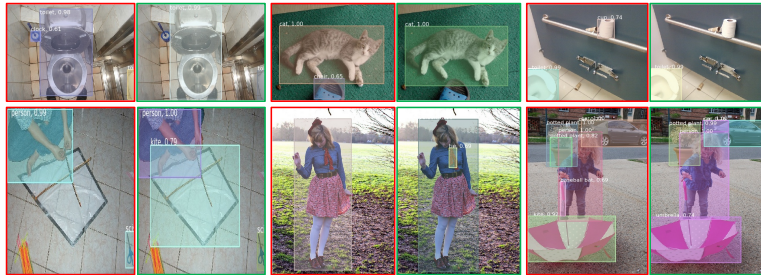

**Figure 1.** Visualization and comparisons of the output results produced by the baseline FPN (*left with red border*) and our HCE FPN (*right with green border*), respectively. **First row:** our context embedding framework can effectively filter out false positive background detection. **Second row:** our framework also enable better classification performance for context-dependent objects. Best viewed in color.
